# Supplementary material for: A copper(ii)-based metal–organic framework: electrochemical sensing of Cd(ii) and Pb(ii) and adsorption of organic dyes
Source: Royal Society of Chemistry journal article supplement (doi:10.1039/d4dt02374a), 2024-12-03
Supplement: d4dt02374a1.pdf [file d4dt02374a1.pdf]

## Supporting Information

A copper(II)-based metal–organic framework: electrochemical sensor  
Cd(II) and Pb(II) and adsorption of organic dyes

Ting-Ting Guo,\* Bing-Long Hua, Zhuo-Yi Guo, Meng-Qi Zhang, Jin-Rong Wang,  
Yan-Yan An, Xiao-Nan Li and Juan-Zhi Yan\*

*Department of Materials Science and Chemical Engineering, Taiyuan University,  
Taiyuan 030000, P.R. China*

\* Correspondence authors

E-mail: guott223@nenu.edu.cn (T.-T. Guo)

E-mail: yanjuanzhi@tyu.edu.cn (J.-Z. Yan)

## Materials and instruments:

All chemicals were achieved commercially. Powder X-ray diffraction (PXRD) patterns were determined with a Rigaku SmartLab X-ray diffractometer with graphite monochromatized Cu K $\alpha$  radiation ( $\lambda = 0.154$  nm). FT-IR spectra were recorded with a Nicolet Magna 560 Fourier transform IR spectrometer. An elemental analyzer (Eurovector EA3000) was applied to acquire C and H data. Thermogravimetric analysis (TGA) curve was measured with a Perkin-Elmer TG-7 analyzer with 10°C per minute under nitrogen gas. The electrochemical experiments were performed using the CHI 660E electrochemical workstation from Shanghai Chenhua. X-ray photoelectron spectroscopy (XPS) was recorded on Thermo Scientific K-Alpha using a monochromatic Al K $\alpha$  source ( $h\nu = 1486.6$ eV).

## X-ray crystallography:

The crystallographic data for **Cu–L** was obtained using an Oxford Diffraction Gemini R CCD equipped with graphite-monochromated MoK $\alpha$  radiation ( $\lambda = 0.71073$  Å). The structure was solved using direct methods with SHELXS-2018/3 and refined on F<sup>2</sup> by full-matrix least-squares refinement employing SHELXTL-2018/3 within WINGX.<sup>1-3</sup> Non-hydrogen atoms were refined anisotropically. Hydrogen atoms were added geometrically. Complete crystallographic data were given in Table S7, while selected bond lengths and bond angles were provided in Tables S8.

(1) G. M. Sheldrick, *SHELXS-2018, Programs for X-ray Crystal Structure Solution*; University of Göttingen: Göttingen, Germany, 2018.

(2) L. J. Farrugia, *WINGX: A Windows Program for Crystal Structure Analysis*; University of Glasgow: Glasgow, UK, 1988.

(3) G. M. Sheldrick, *SHELXTL-2018, Programs for X-ray Crystal Structure Refinement*; University of Göttingen: Göttingen, Germany, 2018.

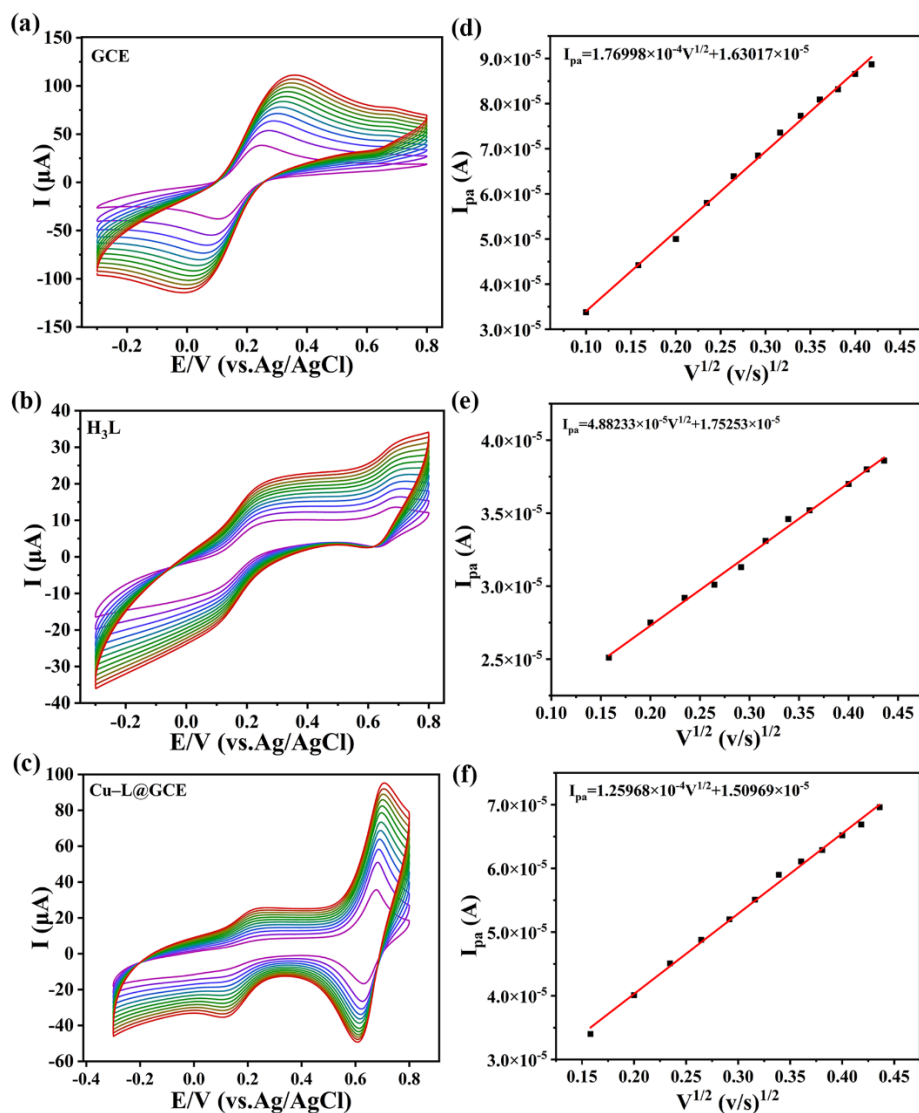

**Figure S1** (a, c, e) CV records for **GCE**, **H<sub>3</sub>L@GCE** and **Cu-L@GCE** in the solution of 5 mM  $[\text{Fe}(\text{CN})_6]^{3-/4-}$  and 0.1 M KCl at various scan rates ( $10\text{--}200 \text{ mV}\cdot\text{s}^{-1}$ ). (b, d, f) The corresponding plot of peak currents ( $I_{pa}$ ) vs the square root of scan rate.

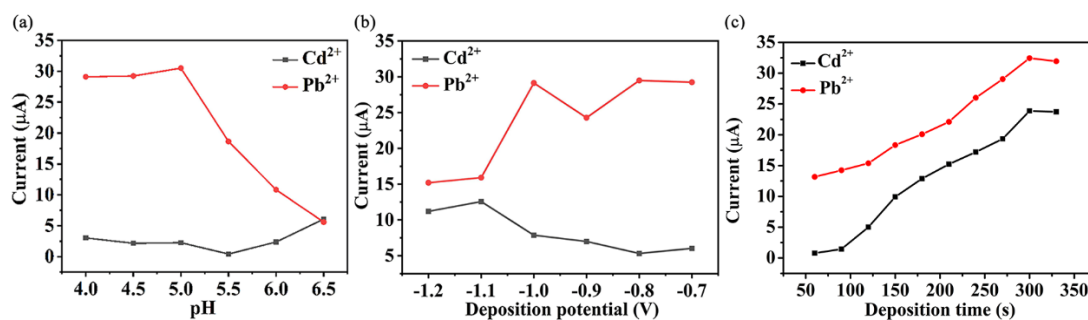

**Figure S2.** (a) Influence of pH values in NaAc-HAc buffer solutions for the detection of  $\text{Cd}^{2+}$  and  $\text{Pb}^{2+}$ . Optimization of deposition potentials (b), and deposition time (c) on

the stripping current responses of **Cu-L@GCE**.

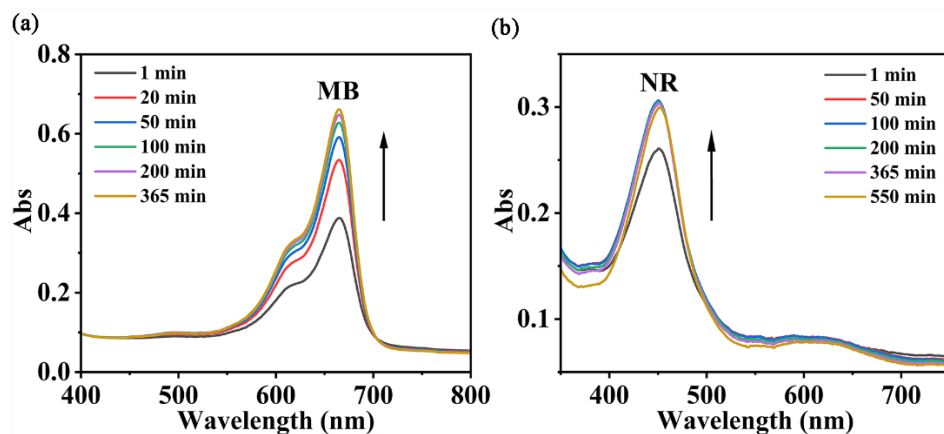

**Figure S3.** UV-vis absorption spectra of DMF solutions with **MB@Cu-L** (a) or **NR@Cu-L** (b) after the dye release in DMF at the given time intervals.

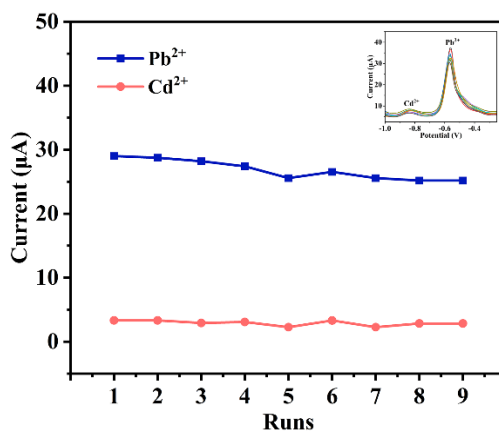

**Figure S4.** Reusability study of **Cu-L@GCE** in 0.1 M ABS (pH=5.0) containing 0.5 μM Pb(II). Data are obtained from every SWA response shown in the inset.

**Table S1** The Influence of the amount of **Cu-L@GCE** on the current of Cd<sup>2+</sup> and

Pb<sup>2+</sup>.

| Current (μA)     | Suspension  |      |       |       |       |       |
|------------------|-------------|------|-------|-------|-------|-------|
|                  | volume (μL) | 3    | 4     | 5     | 6     | 7     |
| Cd <sup>2+</sup> |             | 8.04 | 17.31 | 28.63 | 24.42 | 20.43 |
| Pb <sup>2+</sup> |             | 9.06 | 22.82 | 32.07 | 28.19 | 26.43 |

**Table S2** Summary electrochemical performance for determination of Cd<sup>2+</sup> and Pb<sup>2+</sup> with Cu-L@GCE.

| Types                      | Analytes         | Linear Range (μM) | Linear Regression Equation | R <sup>2</sup> | Detection Limit (μM) |
|----------------------------|------------------|-------------------|----------------------------|----------------|----------------------|
| Individual determination   | Cd <sup>2+</sup> | 8-28              | I(μA)=1.2794 C(μM)-7.5025  | 0.9983         | 0.01363              |
|                            | Pb <sup>2+</sup> | 2-14              | I(μA)=3.8930 C(μM)-6.0132  | 0.9885         | 0.00212              |
| Simultaneous determination | Cd <sup>2+</sup> | 10-30             | I(μA)=0.6199 C(μM)-7.1965  | 0.9884         | 0.00209              |
|                            | Pb <sup>2+</sup> | 5-15              | I(μA)=6.7294C(μM)-34.4137  | 0.9772         | 0.000034             |

**Table S3** Comparison of Cu-L@GCE with other materials modified electrodes for simultaneous determination of Cd<sup>2+</sup> and Pb<sup>2+</sup>.

| Electrodes Materials                                                | Technique | Analytes                             | Linear range (μM)      | LOD (μM)         | Ref. |
|---------------------------------------------------------------------|-----------|--------------------------------------|------------------------|------------------|------|
| UiO-66-NH <sub>2</sub> /GaOOH                                       | SWASV     | Cd <sup>2+</sup><br>Pb <sup>2+</sup> | 0.35–1.60<br>0.55–2.50 | 0.016<br>0.028   | (1)  |
| Fe <sub>2</sub> O <sub>3</sub> /Bi <sub>2</sub> O <sub>3</sub> /GCE | SWASV     | Cd <sup>2+</sup><br>Pb <sup>2+</sup> | 0.01–1.5<br>0.01–2.0   | 0.0056<br>0.0036 | (2)  |
| Co-TMC4R-BDC/GCE                                                    | SWASV     | Cd <sup>2+</sup><br>Pb <sup>2+</sup> | 0.25-12.0<br>0.25-13.0 | 0.058<br>0.044   | (3)  |

|                                        |       |                                                          |                                   |                           |                  |
|----------------------------------------|-------|----------------------------------------------------------|-----------------------------------|---------------------------|------------------|
| Co-TCTA                                | SWV   | Cd <sup>2+</sup><br>Pb <sup>2+</sup>                     | 0.4-8.0<br>0.4-7.0                | 0.071<br>0.022            | (4)              |
| MgFe-LDH/graphene                      | SWASV | Cd <sup>2+</sup><br>Pb <sup>2+</sup>                     | 0.1-1<br>0.1-1                    | 0.0059<br>0.0027          | (5)              |
| PProDOT(MeSH) <sub>2</sub> @S<br>i/GCE | DPV   | Cd <sup>2+</sup><br>Pb <sup>2+</sup><br>Hg <sup>2+</sup> | 0.04-2.8<br>0.024-2.8<br>0.16-3.2 | 0.00575<br>0.027<br>0.017 | (6)              |
| <b>Cu-L@GCE</b>                        | SWV   | Cd <sup>2+</sup><br>Pb <sup>2+</sup>                     | 10-30<br>5-15                     | 0.00209<br>0.000034       | <b>This work</b> |

(1) J. Ru, X. Wang, X. Cui, F. Wang, H. Ji, X. Du and X. G Lu, *Talanta*, 2021, **234**, 122679.

(2) G. Li, X. Qi, G. Zhang, S. Wang, K. Li, J. Wu, X. Wan, Y. Liu. *Microchem. J.*, 2022, **179**, 107515.

(3) F. F. Wang, C. Liu, J. Yang, H. L. Xu, W. Y. Pei, J. F. Ma, *Chem. Eng. J.*, 2022, **438**, 135639.

(4) X. T. Li, X. Niu, J. Yang, W. Y. Pei, J. F. Ma, *Microchim. Acta*, 2022, **189**, 34.

(5) Y. Ma, Y. Wang, D. Xie, Y. Gu, X. Zhu, H. Zhang, G. Wang, Y. Zhang, H. Zhao, *Chem. Eng. J.*, 2018, **347**, 953-962.

(6) M. Abdulla, A. Ali, R. Jamal, T. Bakri, W. Wu, T. Abdiryim, *Polymers*, 2019, **11**, 815.

**Table S4** Comparison of **Cu-L@GCE** with other MOFs modified electrodes for simultaneous determination of Cd<sup>2+</sup> and Pb<sup>2+</sup>.

| Electrodes | Technique | Analytes | Linear range | LOD | Ref. |
|------------|-----------|----------|--------------|-----|------|
|------------|-----------|----------|--------------|-----|------|

| Materials                                                                     |       |                                      | ( $\mu\text{M}$ )      | ( $\mu\text{M}$ )   |                      |
|-------------------------------------------------------------------------------|-------|--------------------------------------|------------------------|---------------------|----------------------|
| GA-UiO-66-NH <sub>2</sub> /GCE                                                | DPSV  | Cd <sup>2+</sup><br>Pb <sup>2+</sup> | 0.01–1.50<br>0.01–2.00 | 0.009<br>0.001      | (1)                  |
| Co-TiC <sub>4</sub> R-I/GCE                                                   | SWASV | Cd <sup>2+</sup><br>Pb <sup>2+</sup> | 0.50–7.00<br>0.50–7.00 | 0.0067<br>0.0027    | (2)                  |
| Fe@YAU-101/GCE                                                                | DPV   | Cd <sup>2+</sup><br>Pb <sup>2+</sup> | 0.003–42<br>0.004–80   | 0.0001<br>0.00133   | (3)                  |
| Cobalt zinc–zeolite<br>imidazole framework<br>nanofiber modified<br>electrode | SWASV | Cd <sup>2+</sup>                     | 0.1–1000               | 0.02727             | (4)                  |
| Co-TMC <sub>4</sub> R-<br>BDC/GCE                                             | SWASV | Cd <sup>2+</sup><br>Pb <sup>2+</sup> | 0.25–12<br>0.25–13     | 0.058<br>0.044      | (5)                  |
| CelloZIFPaper                                                                 | LSV   | Pb <sup>2+</sup>                     | 8–40                   | 8                   | (6)                  |
| <b>Cu-L@GCE</b>                                                               | SWV   | Cd <sup>2+</sup><br>Pb <sup>2+</sup> | 10–30<br>5–15          | 0.00209<br>0.000034 | <b>This<br/>work</b> |

(1) M. Lu, Y. Deng, Y. Luo, J. Lv, T. Li, J. Xu, S. W. Chen and J. Wang, *Anal. Chem.*, 2019, **91**, 888–895

(2) T. T. Guo, X. Y. Cao, Y. Y. An, X. L. Zhang and J. Z. Yan, *Inorg. Chem.*, 2023, **62**, 4485–4494.

(3) Q. Liang, W. Xiao, C. Zhang, D. Zhu, S. L. Wang, S. Y. Tian, T. Long, E. L. Yue, J. J. Wang and X. Y. Hou, *Talanta*, 2023, **259**, 124491.

(4) S. Girija, S. Sam Sankar, T. Thenrajan, S. Kundu and J. Wilson, *J. Mater. Chem.*

B, 2021, 9, 5656.

(5) F. F. Wang, C. Liu, J. Yang, H. L. Xu, W. Y. Pei and J. F. Ma, *Chem. Eng. J.*, 2022, 438, 135639.

(6) H. N. Abdelhamid, D. Georgouvelas, U. Edlund, A. P. Mathew, *Chem. Eng. J.*, 2022, 446, 136614.

**Table S5** Water sample analysis for the detection of Cd<sup>2+</sup> and Pb<sup>2+</sup>.

| Analytes         | Samples       | Added (μM) | Found (μM) | Recovery (%) | Relative Error (%) |
|------------------|---------------|------------|------------|--------------|--------------------|
| Cd <sup>2+</sup> | Tap water     | 0          | —          | —            | —                  |
|                  |               | 16         | 16.03      | 100.20       | 0.20               |
|                  |               | 26         | 26.35      | 101.35       | 1.33               |
|                  | Mineral Water | 0          | —          | —            | —                  |
|                  |               | 16         | 15.86      | 99.10        | 0.90               |
|                  |               | 26         | 25.61      | 98.51        | 1.51               |
|                  | River water   | 0          | —          | —            | —                  |
|                  |               | 16         | 16.20      | 101.23       | 1.22               |
|                  |               | 26         | 25.99      | 99.94        | 0.06               |
| Pb <sup>2+</sup> | Tap water     | 0          | —          | —            | —                  |
|                  |               | 8          | 7.98       | 99.72        | 0.28               |
|                  |               | 13         | 12.64      | 97.20        | 2.88               |
|                  | Mineral Water | 0          | 0.39       | —            | —                  |
|                  |               | 8          | 8.10       | 96.35        | 3.61               |
|                  |               | 13         | 13.12      | 97.93        | 2.05               |
|                  | River water   | 0          | 0.24       | —            | —                  |
|                  |               | 8          | 8.33       | 97.35        | 2.42               |
|                  |               | 13         | 13.62      | 97.59        | 2.45               |

The concentrations of Cd<sup>2+</sup> and Pb<sup>2+</sup> in environmental samples were calculated by the linear equations  $I (\mu A) = 0.6199C (\mu M) - 7.1965$  ( $R^2 = 0.9884$ ) for Cd<sup>2+</sup> and  $I (\mu A) = 6.7294C (\mu M) - 34.4231$  ( $R^2 = 0.9772$ ) for Pb<sup>2+</sup> of simultaneous detection. To improve accuracy, a standard addition method was employed. The values (16 and 26



$\mu\text{M}$  for  $\text{Cd}^{2+}$  and 8 and 13  $\mu\text{M}$  for  $\text{Pb}^{2+}$ ) at both endpoints of the linear range were added.

**Table S6** Comparison of **Cu-L** with other MOFs for dye adsorption.

| MOFs                                                                                                                                            | Organic dye | Qe / removal efficiencies | Time | Ref.             |
|-------------------------------------------------------------------------------------------------------------------------------------------------|-------------|---------------------------|------|------------------|
| $[(\text{CH}_3)_2\text{NH}_2]_2[\text{ZnNa}_2(\mu\text{-H}_2\text{O})_2(\text{H}_2\text{O})_2(\text{TATAT})] \cdot 2\text{DMF}$                 | MB          | 0.75 mg/g                 | 24 h | (1)              |
| Fe@Cu-MOF-2COOH<br>Fe@Ni-MOF-2COOH                                                                                                              | MB          | 38.24 mg/g<br>45.35 mg/g  | -    | (2)              |
| $\{[\text{Cd}(\text{PA})(4,4'\text{-bpy})_2](\text{H}_2\text{O})\}_n$                                                                           | MB          | 29.60 mg/g                | 24 h | (3)              |
| $\{[\text{Co}_4(\text{L}_1)_2(\text{HCOO})_2(\text{OH})_2][\text{SiO}_4(\text{W}_3\text{O}_9)_4]\} \cdot 6\text{DMF} \cdot 5\text{H}_2\text{O}$ | MB          | 87.2%                     | 48 h | (4)              |
| $\{[\text{Zn}_4(\text{L}_1)_2(\text{HCOO})_2(\text{OH})_2][\text{SiO}_4(\text{W}_3\text{O}_9)_4]\} \cdot 6\text{DMF} \cdot 5\text{H}_2\text{O}$ |             | 67.3%                     | 48 h |                  |
| $[\text{Cd}_2(\text{Fe-L}_2)_2(\text{m}_2\text{-O})(\text{H}_2\text{O})_2] \cdot 4\text{DMF} \cdot \text{MeOH} \cdot 2\text{H}_2\text{O}$       | MB          | 5.536 mg/g                | 12 h | (5)              |
| $[\text{Cd}_2(\text{Fe-L}_3)_2(\text{m}_2\text{-O})(\text{H}_2\text{O})_2] \cdot 3\text{DMF}$                                                   |             | 3.511 mg/g                | 12 h |                  |
| <b>Cu-L</b>                                                                                                                                     | MB          | 12.269 mg/g               | 24 h | <b>This work</b> |
|                                                                                                                                                 | NR          | 14.436 mg/g               | 24 h |                  |

$\text{L}_1$  = a new methyl imidazole functionalized resorcin[4]arene;  $\text{H}_4\text{L}_2$  = N,N<sub>0</sub>-cyclohexanediaminebis-(2-hydroxyl-6-carboxy-1-naphthaldehy) and  $\text{H}_4\text{L}_3$  = N,N<sub>0</sub>-o-phenylenediaminebis-(2-hydroxyl-6-carboxy-1-naphthaldehy).

(1) C. Y. Sun, X. L. Wang, C. Qin, J. L. Jin, Z. M. Su, P. Huang and K. Z. Shao, *Chem.Eur. J.*, 2013, **19**, 3639-3645.

- (2) M. Naqi Ahamad, M. Shahnawaz Khan, M. Shahid and M. Ahmad, *Dalton Trans.*, 2020, **49**,14690.
- (3) C. Y. Sun, X. L. Wang, C. Qin, J. L. Jin, Z. M. Su, P. Huang and K. Z. Shao, *Chem. Eur. J.*, 2013, **19**, 3639-3645.
- (4) Q. Y. Zhai, J. Su, T. T. Guo, J. Yang, Jian-Fang Ma, and J. S. Chen, *Cryst. Growth Des.*, 2018, **18**, 6046–6053.
- (5) F. F. Wang, H. Yu, Y. Y. Liu, G. H. Xu, J. F. Ma, *Polyhedron*, 156 (2018) 188–194.

**Table S7** Crystallographic Data for **Cu-L**.

| Compound                                                                   | Cu-L                                                                                          |
|----------------------------------------------------------------------------|-----------------------------------------------------------------------------------------------|
| Formula                                                                    | Cu <sub>3</sub> C <sub>30</sub> H <sub>40</sub> N <sub>8</sub> O <sub>15</sub> S <sub>6</sub> |
| <i>Mr</i>                                                                  | 1117.70                                                                                       |
| Temperature (K)                                                            | 298(2)                                                                                        |
| Crystal system                                                             | Triclinic                                                                                     |
| Space group                                                                | <i>P</i> -1                                                                                   |
| <i>a</i> (Å)                                                               | 11.4638(10)                                                                                   |
| <i>b</i> (Å)                                                               | 12.5600(11)                                                                                   |
| <i>c</i> (Å)                                                               | 16.3969(14)                                                                                   |
| <i>A</i> (°)                                                               | 77.050(3)                                                                                     |
| <i>B</i> (°)                                                               | 78.707(3)                                                                                     |
| <i>γ</i> (°)                                                               | 78.617(3)                                                                                     |
| <i>V</i> (Å <sup>3</sup> )                                                 | 2227.0(3)                                                                                     |
| <i>Z</i>                                                                   | 2                                                                                             |
| <i>D</i> <sub>calc</sub> (g·cm <sup>-3</sup> )                             | 1.667                                                                                         |
| <i>F</i> (000)                                                             | 1138                                                                                          |
| <i>R</i> <sub>int</sub>                                                    | 0.0855                                                                                        |
| GOF on <i>F</i> <sup>2</sup>                                               | 1.024                                                                                         |
| <i>R</i> <sub>1</sub> , <i>wR</i> <sub>2</sub> [ <i>I</i> >2σ( <i>I</i> )] | 0.0713, 0.1812                                                                                |
| <i>R</i> <sub>1</sub> , <i>wR</i> <sub>2</sub> (all data)                  | 0.1385, 0.2191                                                                                |

$$R_1 = \frac{\sum |F_o| - |F_c|}{\sum |F_o|}, wR_2 = \left\{ \frac{\sum w[(F_o)^2 - (F_c)^2]^2}{\sum w(F_o)^2} \right\}^{1/2}$$

**Table S8** Selected bond distances (Å) and angles (deg) for **Cu-L**.

|                                               |            |                                                |            |
|-----------------------------------------------|------------|------------------------------------------------|------------|
| O(1)-Cu(2)                                    | 1.934(5)   | O(4) <sup>#2</sup> -Cu(1)-Cu(2)                | 168.40(12) |
| O(2)-Cu(1)                                    | 1.958(5)   | O(1)-Cu(2)-O(11) <sup>#3</sup>                 | 171.7(2)   |
| O(3)-Cu(2) <sup>#1</sup>                      | 2.024(4)   | O(1)-Cu(2)-O(7)                                | 88.2(2)    |
| O(4)-Cu(1) <sup>#1</sup>                      | 1.978(4)   | O(11) <sup>#3</sup> -Cu(2)-O(7)                | 91.7(2)    |
| O(4)-Cu(1) <sup>#2</sup>                      | 2.214(4)   | O(1)-Cu(2)-O(3) <sup>#3</sup>                  | 90.7(2)    |
| O(7)-Cu(2)                                    | 2.005(4)   | O(11) <sup>#3</sup> -Cu(2)-O(3) <sup>#3</sup>  | 87.0(2)    |
| O(8)-Cu(1)                                    | 1.920(4)   | O(7)-Cu(2)-O(3) <sup>#3</sup>                  | 162.74(19) |
| Cu(1)-O(12) <sup>#3</sup>                     | 1.966(5)   | O(1)-Cu(2)-O(13)                               | 94.1(2)    |
| Cu(1)-Cu(2)                                   | 2.6173(11) | O(11) <sup>#3</sup> -Cu(2)-O(13)               | 94.2(2)    |
| Cu(2)-O(11) <sup>#3</sup>                     | 1.954(5)   | O(7)-Cu(2)-O(13)                               | 98.6(2)    |
| Cu(2)-O(13)                                   | 2.149(5)   | O(3) <sup>#3</sup> -Cu(2)-O(13)                | 98.7(2)    |
| Cu(3)-O(6) <sup>#4</sup>                      | 1.955(5)   | O(1)-Cu(2)-Cu(1)                               | 86.74(16)  |
| Cu(3)-O(5)                                    | 1.956(5)   | O(11) <sup>#3</sup> -Cu(2)-Cu(1)               | 85.01(15)  |
| Cu(3)-O(9) <sup>#2</sup>                      | 1.956(5)   | O(7)-Cu(2)-Cu(1)                               | 80.88(14)  |
| Cu(3)-O(10) <sup>#5</sup>                     | 1.970(5)   | O(3) <sup>#3</sup> -Cu(2)-Cu(1)                | 81.86(13)  |
| Cu(3)-O(14)                                   | 2.152(5)   | O(13)-Cu(2)-Cu(1)                              | 179.05(19) |
| Cu(3)-Cu(3) <sup>#4</sup>                     | 2.6198(16) | O(6) <sup>#4</sup> -Cu(3)-O(5)                 | 168.5(2)   |
| C(6)-O(1)-Cu(2)                               | 120.8(5)   | O(6) <sup>#4</sup> -Cu(3)-O(9) <sup>#2</sup>   | 89.8(2)    |
| C(6)-O(2)-Cu(1)                               | 124.5(5)   | O(5)-Cu(3)-O(9) <sup>#2</sup>                  | 89.5(2)    |
| C(9)-O(3)-Cu(2) <sup>#1</sup>                 | 125.5(4)   | O(6) <sup>#4</sup> -Cu(3)-O(10) <sup>#5</sup>  | 88.7(3)    |
| C(9)-O(4)-Cu(1) <sup>#1</sup>                 | 121.1(4)   | O(5)-Cu(3)-O(10) <sup>#5</sup>                 | 89.7(3)    |
| C(9)-O(4)-Cu(1) <sup>#2</sup>                 | 140.2(4)   | O(9) <sup>#2</sup> -Cu(3)-O(10) <sup>#5</sup>  | 168.2(2)   |
| Cu(1) <sup>#1</sup> -O(4)-Cu(1) <sup>#2</sup> | 98.49(18)  | O(6) <sup>#4</sup> -Cu(3)-O(14)                | 97.1(2)    |
| C(13)-O(7)-Cu(2)                              | 124.5(4)   | O(5)-Cu(3)-O(14)                               | 94.4(2)    |
| C(13)-O(8)-Cu(1)                              | 120.4(4)   | O(9) <sup>#2</sup> -Cu(3)-O(14)                | 98.7(2)    |
| O(8)-Cu(1)-O(2)                               | 89.5(2)    | O(10) <sup>#5</sup> -Cu(3)-O(14)               | 93.1(2)    |
| O(8)-Cu(1)-O(12) <sup>#3</sup>                | 91.3(2)    | O(6) <sup>#4</sup> -Cu(3)-Cu(3) <sup>#4</sup>  | 83.80(16)  |
| O(2)-Cu(1)-O(12) <sup>#3</sup>                | 166.1(2)   | O(5)-Cu(3)-Cu(3) <sup>#4</sup>                 | 84.66(16)  |
| O(8)-Cu(1)-O(4) <sup>#3</sup>                 | 174.9(2)   | O(9) <sup>#2</sup> -Cu(3)-Cu(3) <sup>#4</sup>  | 84.95(16)  |
| O(2)-Cu(1)-O(4) <sup>#3</sup>                 | 90.4(2)    | O(10) <sup>#5</sup> -Cu(3)-Cu(3) <sup>#4</sup> | 83.28(16)  |
| O(12) <sup>#3</sup> -Cu(1)-O(4) <sup>#3</sup> | 87.6(2)    | O(14)-Cu(3)-Cu(3) <sup>#4</sup>                | 176.26(16) |
| O(8)-Cu(1)-O(4) <sup>#2</sup>                 | 103.53(18) | C(12)-O(5)-Cu(3)                               | 122.2(5)   |
| O(2)-Cu(1)-O(4) <sup>#2</sup>                 | 97.96(19)  | C(12)-O(6)-Cu(3) <sup>#4</sup>                 | 123.3(5)   |
| O(12) <sup>#3</sup> -Cu(1)-O(4) <sup>#2</sup> | 95.32(19)  | C(21)-O(11)-Cu(2) <sup>#1</sup>                | 121.9(5)   |
| O(4) <sup>#3</sup> -Cu(1)-O(4) <sup>#2</sup>  | 81.51(18)  | C(21)-O(12)-Cu(1) <sup>#1</sup>                | 122.5(5)   |
| O(8)-Cu(1)-Cu(2)                              | 88.07(15)  | C(24)-O(9)-Cu(3) <sup>#2</sup>                 | 122.7(5)   |
| O(2)-Cu(1)-Cu(2)                              | 82.22(15)  | C(24)-O(10)-Cu(3) <sup>#6</sup>                | 123.8(5)   |
| O(12) <sup>#3</sup> -Cu(1)-Cu(2)              | 83.97(15)  | C(28)-O(14)-Cu(3)                              | 115.5(5)   |
| O(4) <sup>#3</sup> -Cu(1)-Cu(2)               | 86.88(13)  |                                                |            |

Symmetry transformations used to generate equivalent atom: <sup>#1</sup>x, y+1, z; <sup>#2</sup>-x, -y+1, -z;

<sup>#3</sup>x, y-1, z; <sup>#4</sup>-x-1, -y, -z+1; <sup>#5</sup>x-1, y-1, z+1; <sup>#6</sup>x+1, y+1, z-1.
